# Supplementary material for: The Influence of the Recording Time in Modelling the Swimming Behaviour of the Freshwater Inbenthic Copepod Bryocamptus pygmaeus
Source: MDPI journal article supplement (doi:10.3390/w14131996), 2022-06-22
Supplement: s1 [file s1]

Archive with 2 entries (2 files):
- water-1773702-Figures.pdf
- water-1773702-Tables.xlsx
