# Supplementary material for: The Influence of the Recording Time in Modelling the Swimming Behaviour of the Freshwater Inbenthic Copepod Bryocamptus pygmaeus
Source: MDPI journal article supplement (doi:10.3390/w14131996), 2022-06-22
Supplement: s1 [file s1 › water-1773702-Figures.pdf]

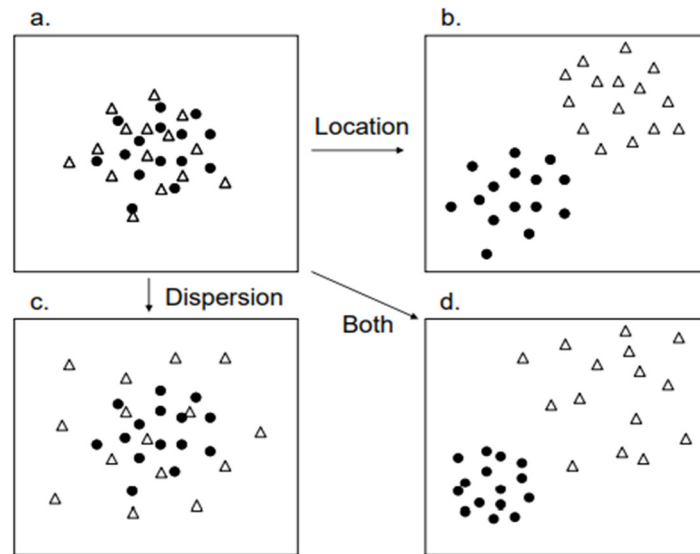

**Figure S1.** Schematic explanation of PERMANOVA and PERMDISP routine from PERMANOVA + manual chapter 2 (Anderson et al., 2008) (Schematic diagram showing two groups of samples in a bivariate system (two dimensions) that (a) do not differ in either location or dispersion, (b) differ only in their location in multivariate space, (c) differ only in their relative dispersions and (d) differ in both their location and in their relative dispersion).

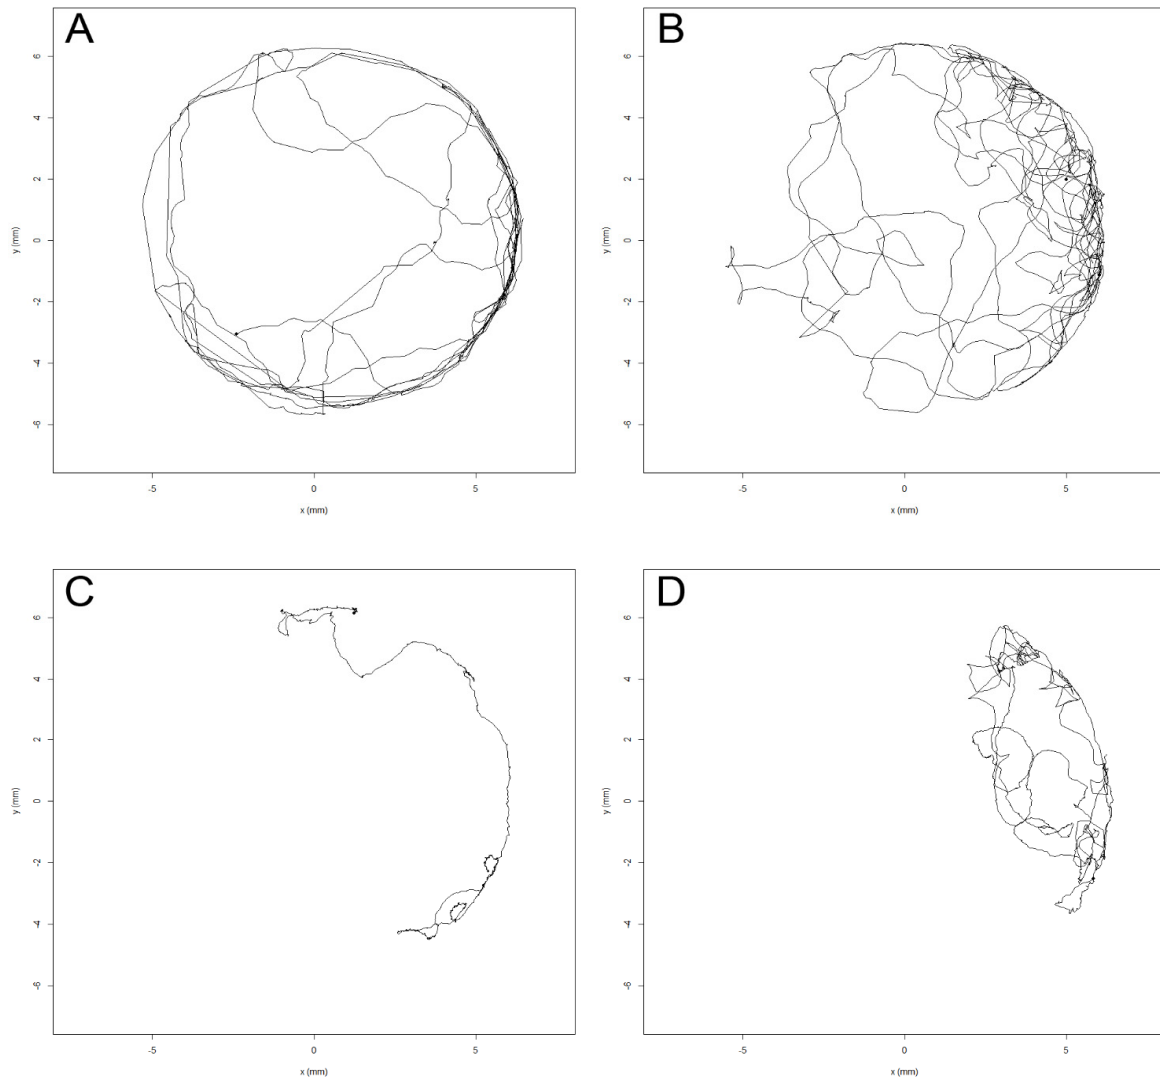

**Figure S2.** Trajectories examples for five mnutes of recording (A = Control Male, B = Control female, C = treatment Male, D = Treatment female)
