# Supplementary material for: The Influence of the Recording Time in Modelling the Swimming Behaviour of the Freshwater Inbenthic Copepod Bryocamptus pygmaeus
Source: MDPI journal article supplement (doi:10.3390/w14131996), 2022-06-22
Supplement: s1 [file s1 › water-1773702-Tables.xlsx]

## Sheet: Table S1
Table S1 Individuals' swimming speeds
file	speed	time	cond	Sex
BP_C1_min1.csv	1.39413571874628	A	con	M
BP_C2_min1.csv	1.19269575369424	A	con	F
BP_C3_min1.csv	0.380867005537381	A	con	M
BP_C4_min1.csv	0.30143289114979	A	con	F
BP_C5_min1.csv	0.971642097758746	A	con	M
BP_C6_min1.csv	1.11235253836724	A	con	F
BP_C7_min1.csv	0.162879339484741	A	con	M
BP_C8_min1.csv	0.569445697370185	A	con	M
BP_C9_min1.csv	0.842325029204804	A	con	F
BP_C10_min1.csv	0.672957285573469	A	con	M
BP_C11_min1.csv	0.3764415056634	A	con	F
BP_C12_min1.csv	1.03466519770803	A	con	F
BP_C13_min1.csv	0.527451712137639	A	con	M
BP_C14_min1.csv	1.03396848371994	A	con	F
BP_C15_min1.csv	0.849994802050216	A	con	F
BP_C16_min1.csv	0.502201211478856	A	con	M
BP_C17_min1.csv	1.00891764418176	A	con	M
BP_C18_min1.csv	0.915928775238098	A	con	F
BP_C19_min1.csv	1.48286865789411	A	con	M
BP_C20_min1.csv	0.624127828489915	A	con	F
BP_C21_min1.csv	0.682809879783808	A	con	M
BP_C22_min1.csv	0.654863757407074	A	con	M
BP_C23_min1.csv	1.0779662736375	A	con	M
BP_C24_min1.csv	0.225756472216137	A	con	F
BP_C25_min1.csv	0.588010466856326	A	con	F
BP_C26_min1.csv	0.743968402475508	A	con	M
BP_C27_min1.csv	0.835552013911273	A	con	F
BP_C28_min1.csv	0.770499164751231	A	con	M
BP_C29_min1.csv	1.3363968839698	A	con	F
BP_C30_min1.csv	1.5521364807093	A	con	F
BP_C31_min1.csv	0.94759036008639	A	con	M
BP_C32_min1.csv	1.10457785878128	A	con	F
BP_C33_min1.csv	0.565295551009981	A	con	F
BP_C34_min1.csv	0.571493003831557	A	con	M
BP_C35_min1.csv	0.205964782119128	A	con	F
BP_C36_min1.csv	0.951144664055742	A	con	M
BP_C37_min1.csv	0.866910997552382	A	con	F
BP_C38_min1.csv	0.793530375817467	A	con	M
BP_C39_min1.csv	0.656288637774333	A	con	F
BP_C1_min2.csv	1.31140557924415	B	con	M
BP_C2_min2.csv	1.29439590743254	B	con	F
BP_C3_min2.csv	0.628071648006813	B	con	M
BP_C4_min2.csv	0.298768799273211	B	con	F
BP_C5_min2.csv	0.974533041264599	B	con	M
BP_C6_min2.csv	1.13497504393308	B	con	F
BP_C7_min2.csv	0.252190870829326	B	con	M
BP_C8_min2.csv	0.612309700235538	B	con	M
BP_C9_min2.csv	0.873832441708855	B	con	F
BP_C10_min2.csv	0.637878321311728	B	con	M
BP_C11_min2.csv	0.475918240275158	B	con	F
BP_C12_min2.csv	0.893915589902747	B	con	F
BP_C13_min2.csv	0.529864211783919	B	con	M
BP_C14_min2.csv	1.05693240516406	B	con	F
BP_C15_min2.csv	0.796606983587756	B	con	F
BP_C16_min2.csv	0.634775044103571	B	con	M
BP_C17_min2.csv	0.935008664334987	B	con	M
BP_C18_min2.csv	0.605867597097392	B	con	F
BP_C19_min2.csv	1.33330610694913	B	con	M
BP_C20_min2.csv	0.697979168089047	B	con	F
BP_C21_min2.csv	0.690732752200534	B	con	M
BP_C22_min2.csv	0.685405422782609	B	con	M
BP_C23_min2.csv	1.05660395301132	B	con	M
BP_C24_min2.csv	0.250065273002815	B	con	F
BP_C25_min2.csv	0.599728285171134	B	con	F
BP_C26_min2.csv	0.758302109826016	B	con	M
BP_C27_min2.csv	0.591458324879676	B	con	F
BP_C28_min2.csv	0.811492729515756	B	con	M
BP_C29_min2.csv	1.13317814929257	B	con	F
BP_C30_min2.csv	1.48705827167814	B	con	F
BP_C31_min2.csv	0.937494198828451	B	con	M
BP_C32_min2.csv	0.847417351799302	B	con	F
BP_C33_min2.csv	0.792130003743828	B	con	F
BP_C34_min2.csv	0.783917930546915	B	con	M
BP_C35_min2.csv	0.144895812304083	B	con	F
BP_C36_min2.csv	0.892577590528315	B	con	M
BP_C37_min2.csv	0.850906388753455	B	con	F
BP_C38_min2.csv	0.654686639162136	B	con	M
BP_C39_min2.csv	0.400252046266614	B	con	F
BP_C1_min3.csv	1.15948131604967	C	con	M
BP_C2_min3.csv	1.23906985515694	C	con	F
BP_C3_min3.csv	0.693477020912335	C	con	M
BP_C4_min3.csv	0.432366226697094	C	con	F
BP_C5_min3.csv	0.868715481511308	C	con	M
BP_C6_min3.csv	1.16788817118319	C	con	F
BP_C7_min3.csv	0.201699351694222	C	con	M
BP_C8_min3.csv	0.597503762760692	C	con	M
BP_C9_min3.csv	0.775079440782959	C	con	F
BP_C10_min3.csv	0.605339415195043	C	con	M
BP_C11_min3.csv	0.440291317325483	C	con	F
BP_C12_min3.csv	0.879103326444693	C	con	F
BP_C13_min3.csv	0.519310896296361	C	con	M
BP_C14_min3.csv	1.05706403544536	C	con	F
BP_C15_min3.csv	0.820053742313733	C	con	F
BP_C16_min3.csv	0.655693902345551	C	con	M
BP_C17_min3.csv	0.881502359360532	C	con	M
BP_C18_min3.csv	0.531653774681867	C	con	F
BP_C19_min3.csv	1.43623837232661	C	con	M
BP_C20_min3.csv	0.629687677425963	C	con	F
BP_C21_min3.csv	0.676488407519586	C	con	M
BP_C22_min3.csv	0.663313946354434	C	con	M
BP_C23_min3.csv	1.00130998674883	C	con	M
BP_C24_min3.csv	0.278530218718403	C	con	F
BP_C25_min3.csv	0.627180450165407	C	con	F
BP_C26_min3.csv	0.774887964263872	C	con	M
BP_C27_min3.csv	0.492043609106755	C	con	F
BP_C28_min3.csv	0.796085905744892	C	con	M
BP_C29_min3.csv	1.16343256396452	C	con	F
BP_C30_min3.csv	1.3972701611173	C	con	F
BP_C31_min3.csv	0.968474799047397	C	con	M
BP_C32_min3.csv	0.816867156589931	C	con	F
BP_C33_min3.csv	0.741600860408165	C	con	F
BP_C34_min3.csv	0.813576405996392	C	con	M
BP_C35_min3.csv	0.096421816086149	C	con	F
BP_C36_min3.csv	0.93916470487332	C	con	M
BP_C37_min3.csv	0.807127638334895	C	con	F
BP_C38_min3.csv	0.612293446517556	C	con	M
BP_C39_min3.csv	0.574315722142419	C	con	F
BP_C1_min4.csv	1.11363687209634	D	con	M
BP_C2_min4.csv	1.19427427119416	D	con	F
BP_C3_min4.csv	0.697395257459756	D	con	M
BP_C4_min4.csv	0.484764813356413	D	con	F
BP_C5_min4.csv	0.839702499569076	D	con	M
BP_C6_min4.csv	1.17578091683253	D	con	F
BP_C7_min4.csv	0.212678799137027	D	con	M
BP_C8_min4.csv	0.590939930484941	D	con	M
BP_C9_min4.csv	0.652850766738366	D	con	F
BP_C10_min4.csv	0.561157433295347	D	con	M
BP_C11_min4.csv	0.41820419461696	D	con	F
BP_C12_min4.csv	0.81152173444208	D	con	F
BP_C13_min4.csv	0.52529928419789	D	con	M
BP_C14_min4.csv	1.05645574098851	D	con	F
BP_C15_min4.csv	0.829449285193564	D	con	F
BP_C16_min4.csv	0.672471110560356	D	con	M
BP_C17_min4.csv	0.871282805911552	D	con	M
BP_C18_min4.csv	0.475950215707557	D	con	F
BP_C19_min4.csv	1.35177768830811	D	con	M
BP_C20_min4.csv	0.618742907212516	D	con	F
BP_C21_min4.csv	0.679215945239626	D	con	M
BP_C22_min4.csv	0.665191171928941	D	con	M
BP_C23_min4.csv	1.00047874310668	D	con	M
BP_C24_min4.csv	0.297736323364112	D	con	F
BP_C25_min4.csv	0.575877817626389	D	con	F
BP_C26_min4.csv	0.781007243041101	D	con	M
BP_C27_min4.csv	0.427683130855131	D	con	F
BP_C28_min4.csv	0.767281925849023	D	con	M
BP_C29_min4.csv	1.03970487804866	D	con	F
BP_C30_min4.csv	1.36688371167425	D	con	F
BP_C31_min4.csv	0.978634552321155	D	con	M
BP_C32_min4.csv	0.730702694626337	D	con	F
BP_C33_min4.csv	0.747038023245078	D	con	F
BP_C34_min4.csv	0.814986870851109	D	con	M
BP_C35_min4.csv	0.118287754153235	D	con	F
BP_C36_min4.csv	0.915560542361341	D	con	M
BP_C37_min4.csv	0.818795664829303	D	con	F
BP_C38_min4.csv	0.560639991525245	D	con	M
BP_C39_min4.csv	0.576948875851387	D	con	F
BP_C1_min5.csv	1.02631696098249	E	con	M
BP_C2_min5.csv	1.18726517438612	E	con	F
BP_C3_min5.csv	0.68500884889425	E	con	M
BP_C4_min5.csv	0.595351087504377	E	con	F
BP_C5_min5.csv	0.829146329444848	E	con	M
BP_C6_min5.csv	1.14326433607423	E	con	F
BP_C7_min5.csv	0.273153726252014	E	con	M
BP_C8_min5.csv	0.601630727274603	E	con	M
BP_C9_min5.csv	0.596219698463381	E	con	F
BP_C10_min5.csv	0.494033203509717	E	con	M
BP_C11_min5.csv	0.382427391762866	E	con	F
BP_C12_min5.csv	0.86402355682917	E	con	F
BP_C13_min5.csv	0.523925589852525	E	con	M
BP_C14_min5.csv	1.03526517417347	E	con	F
BP_C15_min5.csv	0.85652553808005	E	con	F
BP_C16_min5.csv	0.684387904861531	E	con	M
BP_C17_min5.csv	0.823193008542764	E	con	M
BP_C18_min5.csv	0.411218218662988	E	con	F
BP_C19_min5.csv	1.34506816071783	E	con	M
BP_C20_min5.csv	0.660458283321518	E	con	F
BP_C21_min5.csv	0.680485757420822	E	con	M
BP_C22_min5.csv	0.655767299228713	E	con	M
BP_C23_min5.csv	1.01642365698547	E	con	M
BP_C24_min5.csv	0.305198550366282	E	con	F
BP_C25_min5.csv	0.574373927398331	E	con	F
BP_C26_min5.csv	0.768659889604396	E	con	M
BP_C27_min5.csv	0.342999168010175	E	con	F
BP_C28_min5.csv	0.804931570925598	E	con	M
BP_C29_min5.csv	1.0227337938407	E	con	F
BP_C30_min5.csv	1.32168328262548	E	con	F
BP_C31_min5.csv	0.998630752040793	E	con	M
BP_C32_min5.csv	0.801605281725698	E	con	F
BP_C33_min5.csv	0.721892740730919	E	con	F
BP_C34_min5.csv	0.806585250813942	E	con	M
BP_C35_min5.csv	0.153649623237459	E	con	F
BP_C36_min5.csv	0.901860002816737	E	con	M
BP_C37_min5.csv	0.783142281729182	E	con	F
BP_C38_min5.csv	0.523134244418751	E	con	M
BP_C39_min5.csv	0.518896063931265	E	con	F
BP_T1_min1.csv	0.588381712399496	A	tre	F
BP_T2_min1.csv	0.458375207507401	A	tre	F
BP_T3_min1.csv	0.515982691340264	A	tre	M
BP_T4_min1.csv	0.47320321863929	A	tre	F
BP_T5_min1.csv	0.561744967852067	A	tre	M
BP_T6_min1.csv	0.652004586701557	A	tre	F
BP_T7_min1.csv	0.280551951420497	A	tre	F
BP_T8_min1.csv	0.156421962233283	A	tre	M
BP_T9_min1.csv	0.193763433514095	A	tre	M
BP_T10_min1.csv	0.952263608932564	A	tre	M
BP_T11_min1.csv	0.426464232096206	A	tre	F
BP_T13_min1.csv	0.671032506293761	A	tre	F
BP_T14_min1.csv	0.798757504232947	A	tre	M
BP_T15_min1.csv	0.612562646348498	A	tre	F
BP_T16_min1.csv	0.370993739066713	A	tre	M
BP_T17_min1.csv	0.46563677490429	A	tre	F
BP_T18_min1.csv	0.769359116336437	A	tre	M
BP_T19_min1.csv	0.296970485466039	A	tre	F
BP_T20_min1.csv	0.337286563998511	A	tre	F
BP_T21_min1.csv	0.580443084810227	A	tre	M
BP_T22_min1.csv	0.460272890986311	A	tre	M
BP_T23_min1.csv	0.325959533876202	A	tre	F
BP_T24_min1.csv	0.40330753828666	A	tre	F
BP_T25_min1.csv	0.584537581103153	A	tre	M
BP_T26_min1.csv	0.00728640747210988	A	tre	F
BP_T27_min1.csv	0.772277145392057	A	tre	M
BP_T28_min1.csv	0.408846345222916	A	tre	F
BP_T29_min1.csv	0.32463875345318	A	tre	F
BP_T30_min1.csv	0.777406213729803	A	tre	M
BP_T31_min1.csv	0.240261284568756	A	tre	F
BP_T32_min1.csv	0.86762013288097	A	tre	F
BP_T33_min1.csv	0.495205425495685	A	tre	M
BP_T34_min1.csv	0.386746448441695	A	tre	F
BP_T35_min1.csv	0.692240782186221	A	tre	F
BP_T36_min1.csv	0.122558147046638	A	tre	F
BP_T37_min1.csv	0.352802660051777	A	tre	F
BP_T38_min1.csv	0.498579188446464	A	tre	M
BP_T1_min2.csv	0.544122280109743	B	tre	F
BP_T2_min2.csv	0.469190659488775	B	tre	F
BP_T3_min2.csv	0.462711015926445	B	tre	M
BP_T4_min2.csv	0.488379517487138	B	tre	F
BP_T5_min2.csv	0.613862605063771	B	tre	M
BP_T6_min2.csv	0.581666007549757	B	tre	F
BP_T7_min2.csv	0.307412948540554	B	tre	F
BP_T8_min2.csv	0.178867317563875	B	tre	M
BP_T9_min2.csv	0.191329544061484	B	tre	M
BP_T10_min2.csv	0.982814010697286	B	tre	M
BP_T11_min2.csv	0.372554595740789	B	tre	F
BP_T13_min2.csv	0.524496871091959	B	tre	F
BP_T14_min2.csv	0.713019392247987	B	tre	M
BP_T15_min2.csv	0.714581851366023	B	tre	F
BP_T16_min2.csv	0.353613368408292	B	tre	M
BP_T17_min2.csv	0.641057125689891	B	tre	F
BP_T18_min2.csv	0.636583386986759	B	tre	M
BP_T19_min2.csv	0.257751184271609	B	tre	F
BP_T20_min2.csv	0.453879507939964	B	tre	F
BP_T21_min2.csv	0.602122695191186	B	tre	M
BP_T22_min2.csv	0.428488494402781	B	tre	M
BP_T23_min2.csv	0.52907985722844	B	tre	F
BP_T24_min2.csv	0.514069157047631	B	tre	F
BP_T25_min2.csv	0.621410622403305	B	tre	M
BP_T26_min2.csv	0.151520491264618	B	tre	F
BP_T27_min2.csv	0.830245323800141	B	tre	M
BP_T28_min2.csv	0.393375515532654	B	tre	F
BP_T29_min2.csv	0.332130155289394	B	tre	F
BP_T30_min2.csv	0.929141139143236	B	tre	M
BP_T31_min2.csv	0.462668474761469	B	tre	F
BP_T32_min2.csv	1.05129588062956	B	tre	F
BP_T33_min2.csv	0.415575660610169	B	tre	M
BP_T34_min2.csv	0.369590976190372	B	tre	F
BP_T35_min2.csv	0.643112653094987	B	tre	F
BP_T36_min2.csv	0.118517306449754	B	tre	F
BP_T37_min2.csv	0.365739030902789	B	tre	F
BP_T38_min2.csv	0.627696890630243	B	tre	M
BP_T1_min3.csv	0.63722542351601	C	tre	F
BP_T2_min3.csv	0.462211530685979	C	tre	F
BP_T3_min3.csv	0.428340077504763	C	tre	M
BP_T4_min3.csv	0.390189002040988	C	tre	F
BP_T5_min3.csv	0.4802903960424	C	tre	M
BP_T6_min3.csv	0.539854133025497	C	tre	F
BP_T7_min3.csv	0.32077760007452	C	tre	F
BP_T8_min3.csv	0.195964073966621	C	tre	M
BP_T9_min3.csv	0.200437346874825	C	tre	M
BP_T10_min3.csv	0.975085276787781	C	tre	M
BP_T11_min3.csv	0.339043831789214	C	tre	F
BP_T13_min3.csv	0.433856547880052	C	tre	F
BP_T14_min3.csv	0.660995809428089	C	tre	M
BP_T15_min3.csv	0.562368341423571	C	tre	F
BP_T16_min3.csv	0.383294570249465	C	tre	M
BP_T17_min3.csv	0.609839119653238	C	tre	F
BP_T18_min3.csv	0.67667795360896	C	tre	M
BP_T19_min3.csv	0.261765742917059	C	tre	F
BP_T20_min3.csv	0.523290100598194	C	tre	F
BP_T21_min3.csv	0.527970743280023	C	tre	M
BP_T22_min3.csv	0.453412543158594	C	tre	M
BP_T23_min3.csv	0.598492373085946	C	tre	F
BP_T24_min3.csv	0.486728871863856	C	tre	F
BP_T25_min3.csv	0.627088448047772	C	tre	M
BP_T26_min3.csv	0.186571104709266	C	tre	F
BP_T27_min3.csv	0.817004986041944	C	tre	M
BP_T28_min3.csv	0.371980659758273	C	tre	F
BP_T29_min3.csv	0.385520827319593	C	tre	F
BP_T30_min3.csv	0.981824748804893	C	tre	M
BP_T31_min3.csv	0.474564213435423	C	tre	F
BP_T32_min3.csv	1.04904941282522	C	tre	F
BP_T33_min3.csv	0.407746917595459	C	tre	M
BP_T34_min3.csv	0.377402508936458	C	tre	F
BP_T35_min3.csv	0.686733385987674	C	tre	F
BP_T36_min3.csv	0.147163602264232	C	tre	F
BP_T37_min3.csv	0.346836820450507	C	tre	F
BP_T38_min3.csv	0.592534630601325	C	tre	M
BP_T1_min4.csv	0.607040869205628	D	tre	F
BP_T2_min4.csv	0.455724083020438	D	tre	F
BP_T3_min4.csv	0.404794771213944	D	tre	M
BP_T4_min4.csv	0.315691441309338	D	tre	F
BP_T5_min4.csv	0.430370250812552	D	tre	M
BP_T6_min4.csv	0.490079204002956	D	tre	F
BP_T7_min4.csv	0.39467085750421	D	tre	F
BP_T8_min4.csv	0.183002688662051	D	tre	M
BP_T9_min4.csv	0.214345678961709	D	tre	M
BP_T10_min4.csv	0.952614328341394	D	tre	M
BP_T11_min4.csv	0.324458740319845	D	tre	F
BP_T13_min4.csv	0.397210960946754	D	tre	F
BP_T14_min4.csv	0.666613453350194	D	tre	M
BP_T15_min4.csv	0.67990104944558	D	tre	F
BP_T16_min4.csv	0.34728049489042	D	tre	M
BP_T17_min4.csv	0.610132757065572	D	tre	F
BP_T18_min4.csv	0.701241908649646	D	tre	M
BP_T19_min4.csv	0.251002604515478	D	tre	F
BP_T20_min4.csv	0.484472489773881	D	tre	F
BP_T21_min4.csv	0.442889623176025	D	tre	M
BP_T22_min4.csv	0.429757771592245	D	tre	M
BP_T23_min4.csv	0.510357144707405	D	tre	F
BP_T24_min4.csv	0.535966376099207	D	tre	F
BP_T25_min4.csv	0.672368872124368	D	tre	M
BP_T26_min4.csv	0.225779757159777	D	tre	F
BP_T27_min4.csv	0.75671846638818	D	tre	M
BP_T28_min4.csv	0.374982388777834	D	tre	F
BP_T29_min4.csv	0.358284616597287	D	tre	F
BP_T30_min4.csv	1.0640472422174	D	tre	M
BP_T31_min4.csv	0.545920042282317	D	tre	F
BP_T32_min4.csv	1.04958177787743	D	tre	F
BP_T33_min4.csv	0.388397045348937	D	tre	M
BP_T34_min4.csv	0.386628951502933	D	tre	F
BP_T35_min4.csv	0.632243886744435	D	tre	F
BP_T36_min4.csv	0.161293564986212	D	tre	F
BP_T37_min4.csv	0.370161874634329	D	tre	F
BP_T38_min4.csv	0.595479268341856	D	tre	M
BP_T1_min5.csv	0.561473907606123	E	tre	F
BP_T2_min5.csv	0.468716281119507	E	tre	F
BP_T3_min5.csv	0.459095154289174	E	tre	M
BP_T4_min5.csv	0.299179480264481	E	tre	F
BP_T5_min5.csv	0.407001654314582	E	tre	M
BP_T6_min5.csv	0.606600572273382	E	tre	F
BP_T7_min5.csv	0.373719960833397	E	tre	F
BP_T8_min5.csv	0.178579219309162	E	tre	M
BP_T9_min5.csv	0.212060360205883	E	tre	M
BP_T10_min5.csv	0.985120243481238	E	tre	M
BP_T11_min5.csv	0.39865040357876	E	tre	F
BP_T13_min5.csv	0.429449142008579	E	tre	F
BP_T14_min5.csv	0.662306706651734	E	tre	M
BP_T15_min5.csv	0.726945680218523	E	tre	F
BP_T16_min5.csv	0.320918871974171	E	tre	M
BP_T17_min5.csv	0.589577835724645	E	tre	F
BP_T18_min5.csv	0.682410051026754	E	tre	M
BP_T19_min5.csv	0.236178880675393	E	tre	F
BP_T20_min5.csv	0.535701420029175	E	tre	F
BP_T21_min5.csv	0.385943269998958	E	tre	M
BP_T22_min5.csv	0.416766355467209	E	tre	M
BP_T23_min5.csv	0.472266426293669	E	tre	F
BP_T24_min5.csv	0.598439974034333	E	tre	F
BP_T25_min5.csv	0.725337691323958	E	tre	M
BP_T26_min5.csv	0.238759101889106	E	tre	F
BP_T27_min5.csv	0.786447573025963	E	tre	M
BP_T28_min5.csv	0.345364538954358	E	tre	F
BP_T29_min5.csv	0.37162878844281	E	tre	F
BP_T30_min5.csv	1.05228861218159	E	tre	M
BP_T31_min5.csv	0.606404237500168	E	tre	F
BP_T32_min5.csv	1.0493124346182	E	tre	F
BP_T33_min5.csv	0.40901713459199	E	tre	M
BP_T34_min5.csv	0.388796974638602	E	tre	F
BP_T35_min5.csv	0.676320204289276	E	tre	F
BP_T36_min5.csv	0.202800372812624	E	tre	F
BP_T37_min5.csv	0.392169930565821	E	tre	F
BP_T38_min5.csv	0.596841936220644	E	tre	M

## Sheet: Table S2
Table S2 Individuals' percentage of activity
file	act	time	cond	Sex
BP_C1_min1.csv	28.3907859351741	A	con	M
BP_C2_min1.csv	53.9270045394909	A	con	F
BP_C3_min1.csv	22.4995336975998	A	con	M
BP_C4_min1.csv	40.7822231313903	A	con	F
BP_C5_min1.csv	39.8732360028277	A	con	M
BP_C6_min1.csv	50.9934455101114	A	con	F
BP_C7_min1.csv	14.7399767280801	A	con	M
BP_C8_min1.csv	35.57402546283	A	con	M
BP_C9_min1.csv	50.2228754346638	A	con	F
BP_C10_min1.csv	15.9939028642969	A	con	M
BP_C11_min1.csv	47.3149762916563	A	con	F
BP_C12_min1.csv	53.2262664146306	A	con	F
BP_C13_min1.csv	48.0059038803791	A	con	M
BP_C14_min1.csv	54.7963622503138	A	con	F
BP_C15_min1.csv	46.2814608484347	A	con	F
BP_C16_min1.csv	49.1280270509995	A	con	M
BP_C17_min1.csv	45.0561227797095	A	con	M
BP_C18_min1.csv	52.3392562934819	A	con	F
BP_C19_min1.csv	55.4483061586273	A	con	M
BP_C20_min1.csv	52.3103849317756	A	con	F
BP_C21_min1.csv	47.2958125150212	A	con	M
BP_C22_min1.csv	49.5772624297835	A	con	M
BP_C23_min1.csv	54.8217859626105	A	con	M
BP_C24_min1.csv	32.9670543138124	A	con	F
BP_C25_min1.csv	43.4299826499713	A	con	F
BP_C26_min1.csv	51.1617935112752	A	con	M
BP_C27_min1.csv	49.2845671953109	A	con	F
BP_C28_min1.csv	50.9387463312503	A	con	M
BP_C29_min1.csv	53.027438998081	A	con	F
BP_C30_min1.csv	59.0785475835578	A	con	F
BP_C31_min1.csv	52.4957356835014	A	con	M
BP_C32_min1.csv	53.0612994515179	A	con	F
BP_C33_min1.csv	39.0610828489885	A	con	F
BP_C34_min1.csv	47.6965023454562	A	con	M
BP_C35_min1.csv	38.4144810903372	A	con	F
BP_C36_min1.csv	52.5346688175708	A	con	M
BP_C37_min1.csv	52.3486727915865	A	con	F
BP_C38_min1.csv	52.4591690425932	A	con	M
BP_C39_min1.csv	42.6378276761712	A	con	F
BP_C1_min2.csv	31.0707327717689	B	con	M
BP_C2_min2.csv	53.1084642756701	B	con	F
BP_C3_min2.csv	20.783352488702	B	con	M
BP_C4_min2.csv	40.2594537828754	B	con	F
BP_C5_min2.csv	38.9132899916761	B	con	M
BP_C6_min2.csv	47.1231707792453	B	con	F
BP_C7_min2.csv	22.0061768014988	B	con	M
BP_C8_min2.csv	41.6283925840095	B	con	M
BP_C9_min2.csv	49.7381466999645	B	con	F
BP_C10_min2.csv	14.9576171100211	B	con	M
BP_C11_min2.csv	47.1056091387173	B	con	F
BP_C12_min2.csv	49.1237077798452	B	con	F
BP_C13_min2.csv	46.2599061931942	B	con	M
BP_C14_min2.csv	54.8160636620608	B	con	F
BP_C15_min2.csv	47.0805634398576	B	con	F
BP_C16_min2.csv	50.7021042335132	B	con	M
BP_C17_min2.csv	47.4320913099841	B	con	M
BP_C18_min2.csv	46.4401811704707	B	con	F
BP_C19_min2.csv	51.5530945156553	B	con	M
BP_C20_min2.csv	53.4750222893006	B	con	F
BP_C21_min2.csv	47.6468932998636	B	con	M
BP_C22_min2.csv	49.5537032698107	B	con	M
BP_C23_min2.csv	55.0563120586553	B	con	M
BP_C24_min2.csv	36.7997004999978	B	con	F
BP_C25_min2.csv	45.4764641180599	B	con	F
BP_C26_min2.csv	50.6968373433663	B	con	M
BP_C27_min2.csv	39.7595138770519	B	con	F
BP_C28_min2.csv	51.9764359883198	B	con	M
BP_C29_min2.csv	51.5092935777392	B	con	F
BP_C30_min2.csv	58.1847559994244	B	con	F
BP_C31_min2.csv	53.4914484408678	B	con	M
BP_C32_min2.csv	46.9296927555962	B	con	F
BP_C33_min2.csv	43.789023337686	B	con	F
BP_C34_min2.csv	47.6750722324235	B	con	M
BP_C35_min2.csv	27.4551151722686	B	con	F
BP_C36_min2.csv	50.5586650420366	B	con	M
BP_C37_min2.csv	50.4724126083149	B	con	F
BP_C38_min2.csv	49.8381329251935	B	con	M
BP_C39_min2.csv	26.3814086442707	B	con	F
BP_C1_min3.csv	27.4922915106412	C	con	M
BP_C2_min3.csv	52.9683005814154	C	con	F
BP_C3_min3.csv	20.6027966630353	C	con	M
BP_C4_min3.csv	43.5080062774865	C	con	F
BP_C5_min3.csv	35.2934863025588	C	con	M
BP_C6_min3.csv	48.0228792083201	C	con	F
BP_C7_min3.csv	17.9972901088179	C	con	M
BP_C8_min3.csv	43.6965748731026	C	con	M
BP_C9_min3.csv	47.8643983100562	C	con	F
BP_C10_min3.csv	16.4954545698223	C	con	M
BP_C11_min3.csv	46.8904992105925	C	con	F
BP_C12_min3.csv	49.0682602435104	C	con	F
BP_C13_min3.csv	44.4225251736192	C	con	M
BP_C14_min3.csv	54.5603306357277	C	con	F
BP_C15_min3.csv	49.074340976899	C	con	F
BP_C16_min3.csv	50.6441373583696	C	con	M
BP_C17_min3.csv	47.3617511832201	C	con	M
BP_C18_min3.csv	45.2147734087728	C	con	F
BP_C19_min3.csv	49.6667335634865	C	con	M
BP_C20_min3.csv	50.7906396886005	C	con	F
BP_C21_min3.csv	45.3263327488006	C	con	M
BP_C22_min3.csv	49.0204641078347	C	con	M
BP_C23_min3.csv	54.1505981319851	C	con	M
BP_C24_min3.csv	39.3636166754125	C	con	F
BP_C25_min3.csv	45.3282704249015	C	con	F
BP_C26_min3.csv	50.2025667772157	C	con	M
BP_C27_min3.csv	39.8864895017638	C	con	F
BP_C28_min3.csv	50.8660055501278	C	con	M
BP_C29_min3.csv	51.9031257907892	C	con	F
BP_C30_min3.csv	56.9488103885973	C	con	F
BP_C31_min3.csv	53.549076223312	C	con	M
BP_C32_min3.csv	45.9781893344004	C	con	F
BP_C33_min3.csv	40.5875302215496	C	con	F
BP_C34_min3.csv	48.1771201933121	C	con	M
BP_C35_min3.csv	18.2701765059218	C	con	F
BP_C36_min3.csv	51.1569068028599	C	con	M
BP_C37_min3.csv	49.9866742442191	C	con	F
BP_C38_min3.csv	49.4097739337139	C	con	M
BP_C39_min3.csv	30.7972589247843	C	con	F
BP_C1_min4.csv	28.7669600960974	D	con	M
BP_C2_min4.csv	53.2068237355447	D	con	F
BP_C3_min4.csv	20.21316491183	D	con	M
BP_C4_min4.csv	43.9649309882551	D	con	F
BP_C5_min4.csv	35.213626796309	D	con	M
BP_C6_min4.csv	48.6599020213808	D	con	F
BP_C7_min4.csv	18.2791207525544	D	con	M
BP_C8_min4.csv	44.6331609451996	D	con	M
BP_C9_min4.csv	44.2963814610142	D	con	F
BP_C10_min4.csv	18.4082685665332	D	con	M
BP_C11_min4.csv	45.8342101419594	D	con	F
BP_C12_min4.csv	46.7946149165601	D	con	F
BP_C13_min4.csv	44.0003330223318	D	con	M
BP_C14_min4.csv	54.0615442256131	D	con	F
BP_C15_min4.csv	50.2275090052943	D	con	F
BP_C16_min4.csv	48.5717577377227	D	con	M
BP_C17_min4.csv	47.480043071779	D	con	M
BP_C18_min4.csv	44.323185563179	D	con	F
BP_C19_min4.csv	48.2087764974989	D	con	M
BP_C20_min4.csv	49.898775345075	D	con	F
BP_C21_min4.csv	46.3837257511632	D	con	M
BP_C22_min4.csv	49.2813505522487	D	con	M
BP_C23_min4.csv	53.8279987094158	D	con	M
BP_C24_min4.csv	41.1646153717299	D	con	F
BP_C25_min4.csv	44.4190736238073	D	con	F
BP_C26_min4.csv	49.4493393246121	D	con	M
BP_C27_min4.csv	38.8622130385585	D	con	F
BP_C28_min4.csv	47.1356057018003	D	con	M
BP_C29_min4.csv	50.7497011183793	D	con	F
BP_C30_min4.csv	55.4586338784619	D	con	F
BP_C31_min4.csv	53.5603221422571	D	con	M
BP_C32_min4.csv	41.3353940414173	D	con	F
BP_C33_min4.csv	40.3677209427165	D	con	F
BP_C34_min4.csv	48.3326535743787	D	con	M
BP_C35_min4.csv	20.5324296277984	D	con	F
BP_C36_min4.csv	50.9312138065131	D	con	M
BP_C37_min4.csv	49.990628901269	D	con	F
BP_C38_min4.csv	47.1836358819123	D	con	M
BP_C39_min4.csv	30.892382367004	D	con	F
BP_C1_min5.csv	29.4295001686294	E	con	M
BP_C2_min5.csv	53.2768945199567	E	con	F
BP_C3_min5.csv	19.7451269589454	E	con	M
BP_C4_min5.csv	45.3954709187663	E	con	F
BP_C5_min5.csv	34.9939210266304	E	con	M
BP_C6_min5.csv	47.4714611482938	E	con	F
BP_C7_min5.csv	21.837328036774	E	con	M
BP_C8_min5.csv	45.4315557742979	E	con	M
BP_C9_min5.csv	44.0442446945979	E	con	F
BP_C10_min5.csv	18.4625679536224	E	con	M
BP_C11_min5.csv	44.7215332672184	E	con	F
BP_C12_min5.csv	48.3885393388769	E	con	F
BP_C13_min5.csv	43.666592625521	E	con	M
BP_C14_min5.csv	54.3186123166482	E	con	F
BP_C15_min5.csv	51.2045741984347	E	con	F
BP_C16_min5.csv	48.1994748889109	E	con	M
BP_C17_min5.csv	47.9089905965963	E	con	M
BP_C18_min5.csv	39.1334793748569	E	con	F
BP_C19_min5.csv	46.5044413402018	E	con	M
BP_C20_min5.csv	50.7336126776441	E	con	F
BP_C21_min5.csv	46.256888308162	E	con	M
BP_C22_min5.csv	49.1969549505898	E	con	M
BP_C23_min5.csv	54.2404420811694	E	con	M
BP_C24_min5.csv	41.5172757756695	E	con	F
BP_C25_min5.csv	44.4683206857708	E	con	F
BP_C26_min5.csv	49.5170500791204	E	con	M
BP_C27_min5.csv	31.1364362481455	E	con	F
BP_C28_min5.csv	47.1462935804302	E	con	M
BP_C29_min5.csv	50.5129733902815	E	con	F
BP_C30_min5.csv	54.8819891838134	E	con	F
BP_C31_min5.csv	53.5810222390665	E	con	M
BP_C32_min5.csv	42.8491331785989	E	con	F
BP_C33_min5.csv	40.4204966550918	E	con	F
BP_C34_min5.csv	48.4738548062084	E	con	M
BP_C35_min5.csv	25.2658914059499	E	con	F
BP_C36_min5.csv	50.6239266552304	E	con	M
BP_C37_min5.csv	49.4207107851418	E	con	F
BP_C38_min5.csv	45.5972850840607	E	con	M
BP_C39_min5.csv	33.0769600258638	E	con	F
BP_T1_min1.csv	30.211312677042	A	tre	F
BP_T2_min1.csv	42.0481774325225	A	tre	F
BP_T3_min1.csv	47.7790360624366	A	tre	M
BP_T4_min1.csv	48.5316306211451	A	tre	F
BP_T5_min1.csv	34.6977889141205	A	tre	M
BP_T6_min1.csv	49.8489215143473	A	tre	F
BP_T7_min1.csv	37.7341825070753	A	tre	F
BP_T8_min1.csv	30.9415518292727	A	tre	M
BP_T9_min1.csv	32.6628624711245	A	tre	M
BP_T10_min1.csv	37.316380925315	A	tre	M
BP_T11_min1.csv	47.2146099503708	A	tre	F
BP_T13_min1.csv	48.7497917501076	A	tre	F
BP_T14_min1.csv	37.6650753460398	A	tre	M
BP_T15_min1.csv	47.3812901943297	A	tre	F
BP_T16_min1.csv	30.3792804386442	A	tre	M
BP_T17_min1.csv	34.3182439964153	A	tre	F
BP_T18_min1.csv	31.8372859921271	A	tre	M
BP_T19_min1.csv	31.755346127992	A	tre	F
BP_T20_min1.csv	42.3317369734827	A	tre	F
BP_T21_min1.csv	31.9305788576458	A	tre	M
BP_T22_min1.csv	46.1758444653126	A	tre	M
BP_T23_min1.csv	43.8869592923403	A	tre	F
BP_T24_min1.csv	41.3053304177152	A	tre	F
BP_T25_min1.csv	35.8238054490723	A	tre	M
BP_T26_min1.csv	1.62916135112036	A	tre	F
BP_T27_min1.csv	55.0030693761472	A	tre	M
BP_T28_min1.csv	46.1097999278289	A	tre	F
BP_T29_min1.csv	42.8745511567768	A	tre	F
BP_T30_min1.csv	37.4782160105922	A	tre	M
BP_T31_min1.csv	33.4171690678589	A	tre	F
BP_T32_min1.csv	46.2057149252384	A	tre	F
BP_T33_min1.csv	44.2850689798825	A	tre	M
BP_T34_min1.csv	45.2274774954508	A	tre	F
BP_T35_min1.csv	50.8452335001411	A	tre	F
BP_T36_min1.csv	21.7738012755168	A	tre	F
BP_T37_min1.csv	17.8683257650215	A	tre	F
BP_T38_min1.csv	44.023706414216	A	tre	M
BP_T1_min2.csv	31.9988912030777	B	tre	F
BP_T2_min2.csv	40.9112835571112	B	tre	F
BP_T3_min2.csv	43.9514428414097	B	tre	M
BP_T4_min2.csv	48.0835188965283	B	tre	F
BP_T5_min2.csv	33.5960163251003	B	tre	M
BP_T6_min2.csv	44.5525759276414	B	tre	F
BP_T7_min2.csv	37.0178745664174	B	tre	F
BP_T8_min2.csv	30.7981099673387	B	tre	M
BP_T9_min2.csv	33.7793943730621	B	tre	M
BP_T10_min2.csv	36.5213379231645	B	tre	M
BP_T11_min2.csv	44.351590058543	B	tre	F
BP_T13_min2.csv	43.5969888890366	B	tre	F
BP_T14_min2.csv	28.6314431825919	B	tre	M
BP_T15_min2.csv	48.6861411572635	B	tre	F
BP_T16_min2.csv	31.9077692004866	B	tre	M
BP_T17_min2.csv	39.3034966021692	B	tre	F
BP_T18_min2.csv	29.2461192047965	B	tre	M
BP_T19_min2.csv	31.713771465051	B	tre	F
BP_T20_min2.csv	45.5150400212493	B	tre	F
BP_T21_min2.csv	27.6906853336821	B	tre	M
BP_T22_min2.csv	46.1215386768827	B	tre	M
BP_T23_min2.csv	48.2218693259904	B	tre	F
BP_T24_min2.csv	44.8251088257625	B	tre	F
BP_T25_min2.csv	36.6518385731316	B	tre	M
BP_T26_min2.csv	19.986285617464	B	tre	F
BP_T27_min2.csv	55.0724993970067	B	tre	M
BP_T28_min2.csv	42.3859293215858	B	tre	F
BP_T29_min2.csv	41.8156771371959	B	tre	F
BP_T30_min2.csv	35.8255523284931	B	tre	M
BP_T31_min2.csv	39.1290495236942	B	tre	F
BP_T32_min2.csv	49.7913421313348	B	tre	F
BP_T33_min2.csv	44.2596318973835	B	tre	M
BP_T34_min2.csv	45.0047775270383	B	tre	F
BP_T35_min2.csv	49.4803996622419	B	tre	F
BP_T36_min2.csv	21.2649358183082	B	tre	F
BP_T37_min2.csv	20.5091175953941	B	tre	F
BP_T38_min2.csv	48.1117707494084	B	tre	M
BP_T1_min3.csv	35.5864911686267	C	tre	F
BP_T2_min3.csv	41.3940605230293	C	tre	F
BP_T3_min3.csv	44.583364677452	C	tre	M
BP_T4_min3.csv	43.257655836122	C	tre	F
BP_T5_min3.csv	26.6851631222772	C	tre	M
BP_T6_min3.csv	40.6765448064192	C	tre	F
BP_T7_min3.csv	39.0366035314967	C	tre	F
BP_T8_min3.csv	33.221178163002	C	tre	M
BP_T9_min3.csv	34.3755906450776	C	tre	M
BP_T10_min3.csv	39.3177422545676	C	tre	M
BP_T11_min3.csv	40.4894158855392	C	tre	F
BP_T13_min3.csv	42.1142692086877	C	tre	F
BP_T14_min3.csv	27.165566422625	C	tre	M
BP_T15_min3.csv	38.2488867381716	C	tre	F
BP_T16_min3.csv	34.4529924105325	C	tre	M
BP_T17_min3.csv	38.8248077531751	C	tre	F
BP_T18_min3.csv	27.2524920566844	C	tre	M
BP_T19_min3.csv	32.0486678207231	C	tre	F
BP_T20_min3.csv	46.6369605664219	C	tre	F
BP_T21_min3.csv	26.5172355054426	C	tre	M
BP_T22_min3.csv	46.3458174591988	C	tre	M
BP_T23_min3.csv	49.3055453907463	C	tre	F
BP_T24_min3.csv	44.4404842204606	C	tre	F
BP_T25_min3.csv	35.6243948750265	C	tre	M
BP_T26_min3.csv	26.1268531913773	C	tre	F
BP_T27_min3.csv	54.4815804348043	C	tre	M
BP_T28_min3.csv	41.518585919828	C	tre	F
BP_T29_min3.csv	43.557904332383	C	tre	F
BP_T30_min3.csv	38.1425082434793	C	tre	M
BP_T31_min3.csv	41.1903532338385	C	tre	F
BP_T32_min3.csv	50.6279680435945	C	tre	F
BP_T33_min3.csv	45.1644395973763	C	tre	M
BP_T34_min3.csv	45.3562730396593	C	tre	F
BP_T35_min3.csv	49.889756730625	C	tre	F
BP_T36_min3.csv	25.1297440603685	C	tre	F
BP_T37_min3.csv	23.3279268900457	C	tre	F
BP_T38_min3.csv	46.119833649255	C	tre	M
BP_T1_min4.csv	34.4513241099426	D	tre	F
BP_T2_min4.csv	41.4976639198144	D	tre	F
BP_T3_min4.csv	43.559072095593	D	tre	M
BP_T4_min4.csv	33.9545296291307	D	tre	F
BP_T5_min4.csv	26.6104470861477	D	tre	M
BP_T6_min4.csv	39.8299805880676	D	tre	F
BP_T7_min4.csv	39.9534350579531	D	tre	F
BP_T8_min4.csv	32.4195211484163	D	tre	M
BP_T9_min4.csv	35.539195654316	D	tre	M
BP_T10_min4.csv	38.9227536310427	D	tre	M
BP_T11_min4.csv	40.8139742349588	D	tre	F
BP_T13_min4.csv	41.9266079693673	D	tre	F
BP_T14_min4.csv	27.7920666058333	D	tre	M
BP_T15_min4.csv	41.6779781283224	D	tre	F
BP_T16_min4.csv	30.6906522928534	D	tre	M
BP_T17_min4.csv	38.3778813157684	D	tre	F
BP_T18_min4.csv	28.305631481772	D	tre	M
BP_T19_min4.csv	32.0350592286777	D	tre	F
BP_T20_min4.csv	45.0737649799616	D	tre	F
BP_T21_min4.csv	23.9201333676656	D	tre	M
BP_T22_min4.csv	45.0448311728085	D	tre	M
BP_T23_min4.csv	47.3358914116065	D	tre	F
BP_T24_min4.csv	45.7578916702845	D	tre	F
BP_T25_min4.csv	37.4559071438049	D	tre	M
BP_T26_min4.csv	30.9362685896801	D	tre	F
BP_T27_min4.csv	53.9107729167565	D	tre	M
BP_T28_min4.csv	41.5263080483248	D	tre	F
BP_T29_min4.csv	42.0262778970467	D	tre	F
BP_T30_min4.csv	43.4323092572549	D	tre	M
BP_T31_min4.csv	42.6605964326377	D	tre	F
BP_T32_min4.csv	49.8217972746306	D	tre	F
BP_T33_min4.csv	44.4628694592839	D	tre	M
BP_T34_min4.csv	45.855476523388	D	tre	F
BP_T35_min4.csv	49.2367602641434	D	tre	F
BP_T36_min4.csv	26.2695722396232	D	tre	F
BP_T37_min4.csv	28.9353796985756	D	tre	F
BP_T38_min4.csv	45.3111634744405	D	tre	M
BP_T1_min5.csv	36.3138814266822	E	tre	F
BP_T2_min5.csv	41.7849699057842	E	tre	F
BP_T3_min5.csv	44.7177798023425	E	tre	M
BP_T4_min5.csv	34.2631621173629	E	tre	F
BP_T5_min5.csv	24.3687578051408	E	tre	M
BP_T6_min5.csv	41.8431096337417	E	tre	F
BP_T7_min5.csv	39.0575283570251	E	tre	F
BP_T8_min5.csv	32.5929757851528	E	tre	M
BP_T9_min5.csv	33.0314545742641	E	tre	M
BP_T10_min5.csv	36.4454133296303	E	tre	M
BP_T11_min5.csv	42.9874652353742	E	tre	F
BP_T13_min5.csv	43.9027772030129	E	tre	F
BP_T14_min5.csv	25.5623396378858	E	tre	M
BP_T15_min5.csv	43.8825459244348	E	tre	F
BP_T16_min5.csv	30.8314303998789	E	tre	M
BP_T17_min5.csv	36.6117001903085	E	tre	F
BP_T18_min5.csv	30.7664556804254	E	tre	M
BP_T19_min5.csv	31.8858696418128	E	tre	F
BP_T20_min5.csv	45.4533758087409	E	tre	F
BP_T21_min5.csv	22.7964126275313	E	tre	M
BP_T22_min5.csv	44.9027662233343	E	tre	M
BP_T23_min5.csv	45.9241811421377	E	tre	F
BP_T24_min5.csv	45.1875517602617	E	tre	F
BP_T25_min5.csv	38.9976071786276	E	tre	M
BP_T26_min5.csv	33.25655483175	E	tre	F
BP_T27_min5.csv	54.0960035503156	E	tre	M
BP_T28_min5.csv	40.1043592186088	E	tre	F
BP_T29_min5.csv	42.3991477420111	E	tre	F
BP_T30_min5.csv	44.8940211187756	E	tre	M
BP_T31_min5.csv	43.6760041298263	E	tre	F
BP_T32_min5.csv	49.8043108146747	E	tre	F
BP_T33_min5.csv	44.9813660113227	E	tre	M
BP_T34_min5.csv	45.5993709578238	E	tre	F
BP_T35_min5.csv	49.5994541163416	E	tre	F
BP_T36_min5.csv	29.0714743902267	E	tre	F
BP_T37_min5.csv	32.2411489149442	E	tre	F
BP_T38_min5.csv	44.5389382010393	E	tre	M

## Sheet: Table S3
Table S3 Individuals' trajectory convex hull
file	ch	time	cond	Sex
BP_C1_min1.csv	107.730229301578	A	con	M
BP_C2_min1.csv	92.9591089784766	A	con	F
BP_C3_min1.csv	16.9651932129993	A	con	M
BP_C4_min1.csv	1.29465033018617	A	con	F
BP_C5_min1.csv	27.8014811878201	A	con	M
BP_C6_min1.csv	59.7048180156762	A	con	F
BP_C7_min1.csv	3.57094202828156	A	con	M
BP_C8_min1.csv	67.0047212311437	A	con	M
BP_C9_min1.csv	48.4694386142164	A	con	F
BP_C10_min1.csv	52.0324079500756	A	con	M
BP_C11_min1.csv	23.3585337253794	A	con	F
BP_C12_min1.csv	104.619892147551	A	con	F
BP_C13_min1.csv	10.9841712068336	A	con	M
BP_C14_min1.csv	109.230190814822	A	con	F
BP_C15_min1.csv	41.9274220425224	A	con	F
BP_C16_min1.csv	24.6820984303673	A	con	M
BP_C17_min1.csv	11.6407823735624	A	con	M
BP_C18_min1.csv	77.8642245731676	A	con	F
BP_C19_min1.csv	99.2699385732049	A	con	M
BP_C20_min1.csv	94.3352020289998	A	con	F
BP_C21_min1.csv	108.639112537782	A	con	M
BP_C22_min1.csv	8.95369139778273	A	con	M
BP_C23_min1.csv	28.4262248972751	A	con	M
BP_C24_min1.csv	8.44736363059488	A	con	F
BP_C25_min1.csv	78.9967537263588	A	con	F
BP_C26_min1.csv	96.1297120369489	A	con	M
BP_C27_min1.csv	88.7288702577083	A	con	F
BP_C28_min1.csv	88.860465183648	A	con	M
BP_C29_min1.csv	110.215825106453	A	con	F
BP_C30_min1.csv	117.65592358308	A	con	F
BP_C31_min1.csv	117.736838286758	A	con	M
BP_C32_min1.csv	43.0410664909367	A	con	F
BP_C33_min1.csv	9.02709251949978	A	con	F
BP_C34_min1.csv	35.7343271238078	A	con	M
BP_C35_min1.csv	1.34371035516475	A	con	F
BP_C36_min1.csv	105.398416821047	A	con	M
BP_C37_min1.csv	116.6618796778	A	con	F
BP_C38_min1.csv	92.9288261907632	A	con	M
BP_C39_min1.csv	54.9790734141148	A	con	F
BP_C1_min2.csv	108.912567565531	B	con	M
BP_C2_min2.csv	100.456501738317	B	con	F
BP_C3_min2.csv	51.9613214897894	B	con	M
BP_C4_min2.csv	3.21452584582981	B	con	F
BP_C5_min2.csv	85.5577016638906	B	con	M
BP_C6_min2.csv	106.35700651432	B	con	F
BP_C7_min2.csv	24.1538973775124	B	con	M
BP_C8_min2.csv	88.830849488857	B	con	M
BP_C9_min2.csv	110.289418358836	B	con	F
BP_C10_min2.csv	55.5116765054958	B	con	M
BP_C11_min2.csv	34.7146290553501	B	con	F
BP_C12_min2.csv	109.275198093329	B	con	F
BP_C13_min2.csv	13.5733615448064	B	con	M
BP_C14_min2.csv	110.142950465252	B	con	F
BP_C15_min2.csv	43.9891320445952	B	con	F
BP_C16_min2.csv	38.8822140715381	B	con	M
BP_C17_min2.csv	14.5886199029027	B	con	M
BP_C18_min2.csv	109.075643814947	B	con	F
BP_C19_min2.csv	100.1488642106	B	con	M
BP_C20_min2.csv	110.184650895746	B	con	F
BP_C21_min2.csv	109.590005538988	B	con	M
BP_C22_min2.csv	16.3803013290117	B	con	M
BP_C23_min2.csv	73.0022747770848	B	con	M
BP_C24_min2.csv	10.3832288883087	B	con	F
BP_C25_min2.csv	115.363005121205	B	con	F
BP_C26_min2.csv	111.118922987893	B	con	M
BP_C27_min2.csv	88.9391736102581	B	con	F
BP_C28_min2.csv	110.396446182031	B	con	M
BP_C29_min2.csv	119.187406979629	B	con	F
BP_C30_min2.csv	119.394617543763	B	con	F
BP_C31_min2.csv	122.399653219722	B	con	M
BP_C32_min2.csv	53.1073088724854	B	con	F
BP_C33_min2.csv	11.0718427554743	B	con	F
BP_C34_min2.csv	112.582819371035	B	con	M
BP_C35_min2.csv	1.58702177868717	B	con	F
BP_C36_min2.csv	122.608146617088	B	con	M
BP_C37_min2.csv	116.832381276748	B	con	F
BP_C38_min2.csv	109.880189460744	B	con	M
BP_C39_min2.csv	94.44854448639	B	con	F
BP_C1_min3.csv	109.304633995556	C	con	M
BP_C2_min3.csv	103.33405924192	C	con	F
BP_C3_min3.csv	65.5360754585548	C	con	M
BP_C4_min3.csv	103.925693701393	C	con	F
BP_C5_min3.csv	102.637208752508	C	con	M
BP_C6_min3.csv	107.632682650522	C	con	F
BP_C7_min3.csv	24.1719687506413	C	con	M
BP_C8_min3.csv	107.956605053795	C	con	M
BP_C9_min3.csv	110.426017837209	C	con	F
BP_C10_min3.csv	69.4061623213519	C	con	M
BP_C11_min3.csv	54.1219939648447	C	con	F
BP_C12_min3.csv	109.688257806841	C	con	F
BP_C13_min3.csv	15.3560709952253	C	con	M
BP_C14_min3.csv	110.544541314583	C	con	F
BP_C15_min3.csv	47.3688646751409	C	con	F
BP_C16_min3.csv	54.0397472807234	C	con	M
BP_C17_min3.csv	14.625234435514	C	con	M
BP_C18_min3.csv	110.430784949309	C	con	F
BP_C19_min3.csv	103.576038330012	C	con	M
BP_C20_min3.csv	110.341036098748	C	con	F
BP_C21_min3.csv	110.412116538965	C	con	M
BP_C22_min3.csv	20.4673568707569	C	con	M
BP_C23_min3.csv	73.0756698395069	C	con	M
BP_C24_min3.csv	41.7407323679808	C	con	F
BP_C25_min3.csv	115.967442433736	C	con	F
BP_C26_min3.csv	115.345743555581	C	con	M
BP_C27_min3.csv	89.390192881196	C	con	F
BP_C28_min3.csv	117.330969544974	C	con	M
BP_C29_min3.csv	120.053990522027	C	con	F
BP_C30_min3.csv	121.140853855909	C	con	F
BP_C31_min3.csv	123.550798931848	C	con	M
BP_C32_min3.csv	61.6580351648557	C	con	F
BP_C33_min3.csv	11.6236150062826	C	con	F
BP_C34_min3.csv	119.164614185524	C	con	M
BP_C35_min3.csv	1.58702177868717	C	con	F
BP_C36_min3.csv	125.709066934727	C	con	M
BP_C37_min3.csv	117.239330355851	C	con	F
BP_C38_min3.csv	109.880189460744	C	con	M
BP_C39_min3.csv	112.626753127761	C	con	F
BP_C1_min4.csv	109.692716282319	D	con	M
BP_C2_min4.csv	105.619030968386	D	con	F
BP_C3_min4.csv	66.9111145286153	D	con	M
BP_C4_min4.csv	104.328929473147	D	con	F
BP_C5_min4.csv	105.365194101127	D	con	M
BP_C6_min4.csv	109.739954552275	D	con	F
BP_C7_min4.csv	24.4789442307153	D	con	M
BP_C8_min4.csv	108.380965105486	D	con	M
BP_C9_min4.csv	110.426017837209	D	con	F
BP_C10_min4.csv	99.0346108201728	D	con	M
BP_C11_min4.csv	54.5639860607751	D	con	F
BP_C12_min4.csv	109.768878492989	D	con	F
BP_C13_min4.csv	20.7163139385753	D	con	M
BP_C14_min4.csv	112.75483878437	D	con	F
BP_C15_min4.csv	53.4762706541501	D	con	F
BP_C16_min4.csv	84.2763542753263	D	con	M
BP_C17_min4.csv	14.6414642814175	D	con	M
BP_C18_min4.csv	110.643268010551	D	con	F
BP_C19_min4.csv	103.730674502475	D	con	M
BP_C20_min4.csv	110.441856063458	D	con	F
BP_C21_min4.csv	111.435607095104	D	con	M
BP_C22_min4.csv	29.0177422310681	D	con	M
BP_C23_min4.csv	88.2841920036586	D	con	M
BP_C24_min4.csv	113.66340302382	D	con	F
BP_C25_min4.csv	116.235667617481	D	con	F
BP_C26_min4.csv	116.515779861667	D	con	M
BP_C27_min4.csv	89.4895087386839	D	con	F
BP_C28_min4.csv	119.880925041956	D	con	M
BP_C29_min4.csv	120.322419310079	D	con	F
BP_C30_min4.csv	121.667529593684	D	con	F
BP_C31_min4.csv	123.745130595671	D	con	M
BP_C32_min4.csv	65.6807074402354	D	con	F
BP_C33_min4.csv	34.4066522487973	D	con	F
BP_C34_min4.csv	122.114085036284	D	con	M
BP_C35_min4.csv	2.64213213146442	D	con	F
BP_C36_min4.csv	125.976428407525	D	con	M
BP_C37_min4.csv	117.453228896775	D	con	F
BP_C38_min4.csv	109.906980247949	D	con	M
BP_C39_min4.csv	112.810330508774	D	con	F
BP_C1_min5.csv	109.738913604186	E	con	M
BP_C2_min5.csv	105.707262118223	E	con	F
BP_C3_min5.csv	67.3830899271034	E	con	M
BP_C4_min5.csv	108.012735659584	E	con	F
BP_C5_min5.csv	107.594583078696	E	con	M
BP_C6_min5.csv	110.024868853026	E	con	F
BP_C7_min5.csv	25.3408033476212	E	con	M
BP_C8_min5.csv	109.378490289935	E	con	M
BP_C9_min5.csv	110.481093862628	E	con	F
BP_C10_min5.csv	106.850740102178	E	con	M
BP_C11_min5.csv	54.6276397195233	E	con	F
BP_C12_min5.csv	109.856907869784	E	con	F
BP_C13_min5.csv	24.2445080079552	E	con	M
BP_C14_min5.csv	113.084144355284	E	con	F
BP_C15_min5.csv	56.7986051008251	E	con	F
BP_C16_min5.csv	84.4610855827071	E	con	M
BP_C17_min5.csv	14.676782152285	E	con	M
BP_C18_min5.csv	110.72683296645	E	con	F
BP_C19_min5.csv	110.194994456463	E	con	M
BP_C20_min5.csv	111.302501204432	E	con	F
BP_C21_min5.csv	111.458652369439	E	con	M
BP_C22_min5.csv	32.9006642957996	E	con	M
BP_C23_min5.csv	113.678419950608	E	con	M
BP_C24_min5.csv	115.420656226626	E	con	F
BP_C25_min5.csv	116.656306721847	E	con	F
BP_C26_min5.csv	117.127010291345	E	con	M
BP_C27_min5.csv	89.4895087386839	E	con	F
BP_C28_min5.csv	120.463909685593	E	con	M
BP_C29_min5.csv	122.414410163211	E	con	F
BP_C30_min5.csv	123.457252609522	E	con	F
BP_C31_min5.csv	123.834735323135	E	con	M
BP_C32_min5.csv	99.6650093406508	E	con	F
BP_C33_min5.csv	53.4061284072712	E	con	F
BP_C34_min5.csv	122.565731867176	E	con	M
BP_C35_min5.csv	53.0618388937326	E	con	F
BP_C36_min5.csv	126.6214888389	E	con	M
BP_C37_min5.csv	117.460304547995	E	con	F
BP_C38_min5.csv	109.950968958898	E	con	M
BP_C39_min5.csv	112.810330508774	E	con	F
BP_T1_min1.csv	20.4965	A	tre	F
BP_T2_min1.csv	9.8277870418635	A	tre	F
BP_T3_min1.csv	62.848491434455	A	tre	M
BP_T4_min1.csv	8.95290272887045	A	tre	F
BP_T5_min1.csv	24.769642363242	A	tre	M
BP_T6_min1.csv	92.2927451516202	A	tre	F
BP_T7_min1.csv	1.35329289651396	A	tre	F
BP_T8_min1.csv	1.39856931860178	A	tre	M
BP_T9_min1.csv	5.25533120410987	A	tre	M
BP_T10_min1.csv	88.5039990435381	A	tre	M
BP_T11_min1.csv	10.0213113905389	A	tre	F
BP_T13_min1.csv	101.520504403777	A	tre	F
BP_T14_min1.csv	65.6670975582525	A	tre	M
BP_T15_min1.csv	53.9405747941773	A	tre	F
BP_T16_min1.csv	15.7060838355511	A	tre	M
BP_T17_min1.csv	38.0614747150437	A	tre	F
BP_T18_min1.csv	79.2512987050796	A	tre	M
BP_T19_min1.csv	16.4597413826442	A	tre	F
BP_T20_min1.csv	2.3061728500143	A	tre	F
BP_T21_min1.csv	60.6432452142823	A	tre	M
BP_T22_min1.csv	65.3852727088661	A	tre	M
BP_T23_min1.csv	1.90493539580324	A	tre	F
BP_T24_min1.csv	27.274409735257	A	tre	F
BP_T25_min1.csv	58.3629909291237	A	tre	M
BP_T26_min1.csv	0.012424581669939	A	tre	F
BP_T27_min1.csv	85.4994324206995	A	tre	M
BP_T28_min1.csv	11.5648647445513	A	tre	F
BP_T29_min1.csv	12.2588300118199	A	tre	F
BP_T30_min1.csv	69.7478534187871	A	tre	M
BP_T31_min1.csv	1.65574645291366	A	tre	F
BP_T32_min1.csv	67.0012700435727	A	tre	F
BP_T33_min1.csv	43.9196781388879	A	tre	M
BP_T34_min1.csv	35.9549957009465	A	tre	F
BP_T35_min1.csv	75.9368943883995	A	tre	F
BP_T36_min1.csv	0.689291689779788	A	tre	F
BP_T37_min1.csv	9.84081166300729	A	tre	F
BP_T38_min1.csv	41.1579915575723	A	tre	M
BP_T1_min2.csv	34.2649	B	tre	F
BP_T2_min2.csv	15.4765368408379	B	tre	F
BP_T3_min2.csv	96.1155830197065	B	tre	M
BP_T4_min2.csv	11.2676274100752	B	tre	F
BP_T5_min2.csv	46.4631637907077	B	tre	M
BP_T6_min2.csv	92.3846560335909	B	tre	F
BP_T7_min2.csv	11.7708405496576	B	tre	F
BP_T8_min2.csv	8.04208460238675	B	tre	M
BP_T9_min2.csv	13.5233231063109	B	tre	M
BP_T10_min2.csv	95.8579198816814	B	tre	M
BP_T11_min2.csv	21.6150634994895	B	tre	F
BP_T13_min2.csv	103.618191341402	B	tre	F
BP_T14_min2.csv	67.165222640631	B	tre	M
BP_T15_min2.csv	64.4577221399989	B	tre	F
BP_T16_min2.csv	23.9374625118895	B	tre	M
BP_T17_min2.csv	102.995718958769	B	tre	F
BP_T18_min2.csv	79.8805873502864	B	tre	M
BP_T19_min2.csv	25.5980088309374	B	tre	F
BP_T20_min2.csv	52.3123605786758	B	tre	F
BP_T21_min2.csv	105.183061949909	B	tre	M
BP_T22_min2.csv	66.5276573741544	B	tre	M
BP_T23_min2.csv	29.9051191419336	B	tre	F
BP_T24_min2.csv	68.7399094060501	B	tre	F
BP_T25_min2.csv	63.5476779973663	B	tre	M
BP_T26_min2.csv	21.4060776482742	B	tre	F
BP_T27_min2.csv	105.138404290171	B	tre	M
BP_T28_min2.csv	63.502743501202	B	tre	F
BP_T29_min2.csv	67.5505758099698	B	tre	F
BP_T30_min2.csv	103.695607433625	B	tre	M
BP_T31_min2.csv	65.449219773315	B	tre	F
BP_T32_min2.csv	86.2632370160842	B	tre	F
BP_T33_min2.csv	94.8904569823833	B	tre	M
BP_T34_min2.csv	47.5459276847975	B	tre	F
BP_T35_min2.csv	82.169289994425	B	tre	F
BP_T36_min2.csv	2.44455439174417	B	tre	F
BP_T37_min2.csv	20.3098185606377	B	tre	F
BP_T38_min2.csv	94.3940518822935	B	tre	M
BP_T1_min3.csv	55.776	C	tre	F
BP_T2_min3.csv	19.8142673201307	C	tre	F
BP_T3_min3.csv	96.4163369786431	C	tre	M
BP_T4_min3.csv	13.527421974397	C	tre	F
BP_T5_min3.csv	46.7266493257193	C	tre	M
BP_T6_min3.csv	103.81648544652	C	tre	F
BP_T7_min3.csv	19.3492860917949	C	tre	F
BP_T8_min3.csv	38.1722173898038	C	tre	M
BP_T9_min3.csv	25.0740933129364	C	tre	M
BP_T10_min3.csv	96.6234272636545	C	tre	M
BP_T11_min3.csv	23.9267708039944	C	tre	F
BP_T13_min3.csv	103.683283294219	C	tre	F
BP_T14_min3.csv	67.768446427261	C	tre	M
BP_T15_min3.csv	64.4978717070054	C	tre	F
BP_T16_min3.csv	28.2237797098331	C	tre	M
BP_T17_min3.csv	103.020692774713	C	tre	F
BP_T18_min3.csv	108.419289884515	C	tre	M
BP_T19_min3.csv	38.6549332815512	C	tre	F
BP_T20_min3.csv	109.864550076013	C	tre	F
BP_T21_min3.csv	105.84529734408	C	tre	M
BP_T22_min3.csv	71.4194494029156	C	tre	M
BP_T23_min3.csv	45.6965368138145	C	tre	F
BP_T24_min3.csv	105.179724597522	C	tre	F
BP_T25_min3.csv	71.4334189409592	C	tre	M
BP_T26_min3.csv	54.9844503590383	C	tre	F
BP_T27_min3.csv	107.327274204549	C	tre	M
BP_T28_min3.csv	65.9978920054311	C	tre	F
BP_T29_min3.csv	87.2751739254482	C	tre	F
BP_T30_min3.csv	108.986391863301	C	tre	M
BP_T31_min3.csv	65.9666040913328	C	tre	F
BP_T32_min3.csv	110.834567117115	C	tre	F
BP_T33_min3.csv	96.7231144304121	C	tre	M
BP_T34_min3.csv	80.6342680849064	C	tre	F
BP_T35_min3.csv	105.287276043326	C	tre	F
BP_T36_min3.csv	4.79175922616718	C	tre	F
BP_T37_min3.csv	45.1521784570903	C	tre	F
BP_T38_min3.csv	105.928149883814	C	tre	M
BP_T1_min4.csv	88.3335	D	tre	F
BP_T2_min4.csv	26.9989267093279	D	tre	F
BP_T3_min4.csv	97.0371352885808	D	tre	M
BP_T4_min4.csv	14.0794999216538	D	tre	F
BP_T5_min4.csv	46.9073969941086	D	tre	M
BP_T6_min4.csv	103.81648544652	D	tre	F
BP_T7_min4.csv	48.6014474425238	D	tre	F
BP_T8_min4.csv	47.7424628970943	D	tre	M
BP_T9_min4.csv	37.4361498656152	D	tre	M
BP_T10_min4.csv	100.095214849414	D	tre	M
BP_T11_min4.csv	23.9267708039944	D	tre	F
BP_T13_min4.csv	104.331748560855	D	tre	F
BP_T14_min4.csv	67.953842213433	D	tre	M
BP_T15_min4.csv	86.7994219282127	D	tre	F
BP_T16_min4.csv	28.3683287944634	D	tre	M
BP_T17_min4.csv	105.163096979861	D	tre	F
BP_T18_min4.csv	109.769390915885	D	tre	M
BP_T19_min4.csv	39.679285638148	D	tre	F
BP_T20_min4.csv	109.864550076013	D	tre	F
BP_T21_min4.csv	105.923942585105	D	tre	M
BP_T22_min4.csv	71.4372838420541	D	tre	M
BP_T23_min4.csv	46.0284297634601	D	tre	F
BP_T24_min4.csv	106.409969918328	D	tre	F
BP_T25_min4.csv	99.3416889217255	D	tre	M
BP_T26_min4.csv	75.5404692354622	D	tre	F
BP_T27_min4.csv	107.434203817792	D	tre	M
BP_T28_min4.csv	106.948183592687	D	tre	F
BP_T29_min4.csv	104.434915300978	D	tre	F
BP_T30_min4.csv	110.466763500662	D	tre	M
BP_T31_min4.csv	94.9428564766802	D	tre	F
BP_T32_min4.csv	112.761543498195	D	tre	F
BP_T33_min4.csv	100.414240830639	D	tre	M
BP_T34_min4.csv	83.4117701568784	D	tre	F
BP_T35_min4.csv	107.514588621656	D	tre	F
BP_T36_min4.csv	5.36910902197379	D	tre	F
BP_T37_min4.csv	45.2887870868077	D	tre	F
BP_T38_min4.csv	106.939806544655	D	tre	M
BP_T1_min5.csv	88.7479	E	tre	F
BP_T2_min5.csv	31.0549769286608	E	tre	F
BP_T3_min5.csv	97.3916084834047	E	tre	M
BP_T4_min5.csv	14.6531690784008	E	tre	F
BP_T5_min5.csv	58.5972947210644	E	tre	M
BP_T6_min5.csv	107.978211517508	E	tre	F
BP_T7_min5.csv	49.3379469161017	E	tre	F
BP_T8_min5.csv	47.7553870931207	E	tre	M
BP_T9_min5.csv	37.4361498656152	E	tre	M
BP_T10_min5.csv	108.334693637383	E	tre	M
BP_T11_min5.csv	26.493926169273	E	tre	F
BP_T13_min5.csv	104.355518939019	E	tre	F
BP_T14_min5.csv	68.7401639523705	E	tre	M
BP_T15_min5.csv	106.869567912488	E	tre	F
BP_T16_min5.csv	28.3683287944634	E	tre	M
BP_T17_min5.csv	105.405214670334	E	tre	F
BP_T18_min5.csv	110.420927745104	E	tre	M
BP_T19_min5.csv	39.6966191119992	E	tre	F
BP_T20_min5.csv	109.905593009495	E	tre	F
BP_T21_min5.csv	105.98032100656	E	tre	M
BP_T22_min5.csv	71.4774027776348	E	tre	M
BP_T23_min5.csv	54.3638897270539	E	tre	F
BP_T24_min5.csv	106.721823979331	E	tre	F
BP_T25_min5.csv	111.883765073882	E	tre	M
BP_T26_min5.csv	75.674861624209	E	tre	F
BP_T27_min5.csv	109.841740231838	E	tre	M
BP_T28_min5.csv	108.349419337239	E	tre	F
BP_T29_min5.csv	105.349310250373	E	tre	F
BP_T30_min5.csv	110.68293389285	E	tre	M
BP_T31_min5.csv	104.879647448146	E	tre	F
BP_T32_min5.csv	113.188875371247	E	tre	F
BP_T33_min5.csv	102.463344487824	E	tre	M
BP_T34_min5.csv	83.6990943712268	E	tre	F
BP_T35_min5.csv	109.0189714799	E	tre	F
BP_T36_min5.csv	8.63961376187928	E	tre	F
BP_T37_min5.csv	45.3213813019459	E	tre	F
BP_T38_min5.csv	107.200260810322	E	tre	M
